# Supplementary material for: Exploring chromosomal structural heterogeneity across multiple cell lines
Source: eLife journal article supplement (doi:10.7554/elife.60312), 2020-10-13

Loop domains form globular lobes at the head and tail of Segment 1

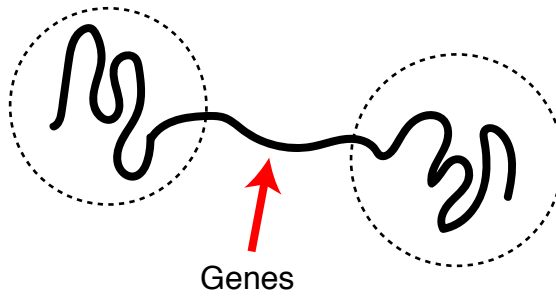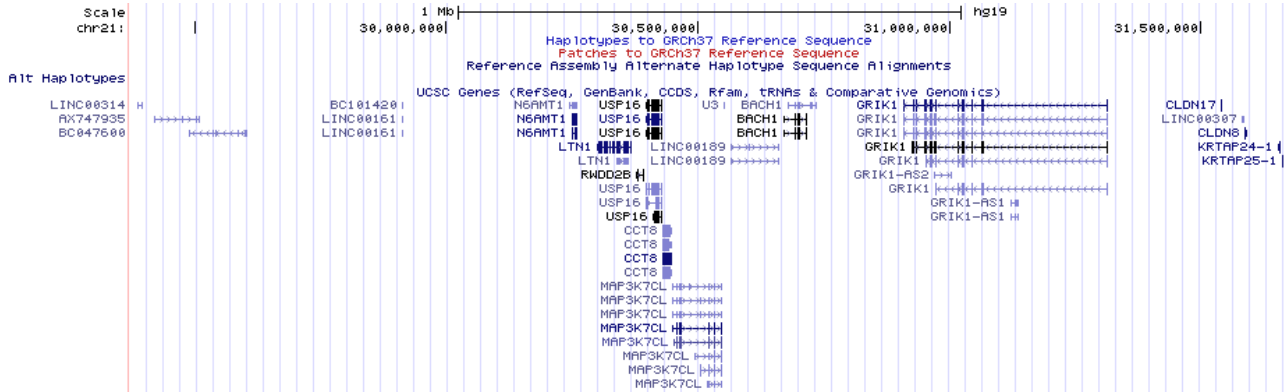

### B Segment 2 (20.0-21.9Mb)

No CTCF-mediated loops  
Random coil-like structures

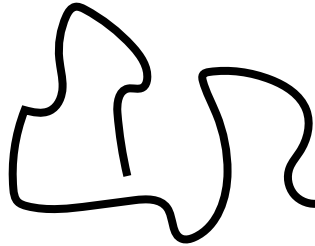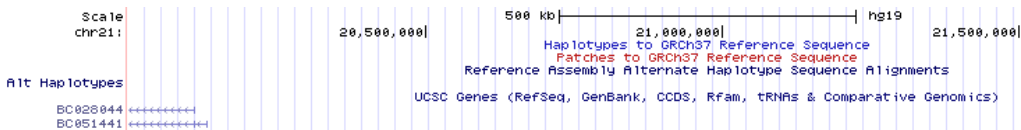

Supplement: supp [file elife-60312-supp-v1.zip]
