# Supplementary material for: Exploring chromosomal structural heterogeneity across multiple cell lines
Source: eLife journal article supplement (doi:10.7554/elife.60312), 2020-10-13
Supplement: supp [file elife-60312-supp-v1.zip]

Archive with 14 entries (14 files):
- elife_poa_e60312_Transparent_Reporting_File.pdf
- elife_poa_e60312_Figure_1_figure_supplement_1.pdf
- elife_poa_e60312_Figure_1_figure_supplement_2.pdf
- elife_poa_e60312_Figure_1_figure_supplement_3.pdf
- elife_poa_e60312_Figure_1_figure_supplement_4.pdf
- elife_poa_e60312_Figure_1_figure_supplement_5.pdf
- elife_poa_e60312_Figure_2_figure_supplement_1.pdf
- elife_poa_e60312_Figure_2_figure_supplement_2.pdf
- elife_poa_e60312_Figure_2_figure_supplement_3.pdf
- elife_poa_e60312_Figure_2_figure_supplement_4.pdf
- elife_poa_e60312_Figure_3_figure_supplement_1.pdf
- elife_poa_e60312_Figure_3_figure_supplement_2.pdf
- elife_poa_e60312_Figure_3_figure_supplement_3.pdf
- elife_poa_e60312_Supplementary_file_1.docx
