# Supplementary material for: Exploring chromosomal structural heterogeneity across multiple cell lines
Source: eLife journal article supplement (doi:10.7554/elife.60312), 2020-10-13
Supplement: supp [file elife-60312-supp-v1.zip › elife_poa_e60312_Figure_1_figure_supplement_2.pdf]

# H1-hESC (chr 2)

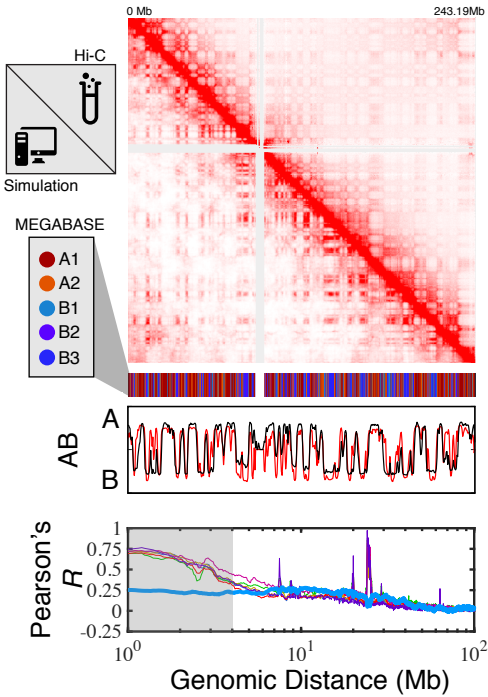

## Legend

Matching cell type:

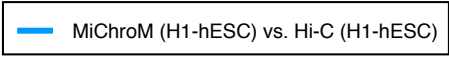

Mismatching cell type:

Hi-C (Figure S1 A, B, or C)

- vs. Hi-C (HMEC)
- vs. Hi-C (GM12878)
- vs. Hi-C (HUVEC)
- vs. Hi-C (IMR90)
- vs. Hi-C (K562)
- vs. Hi-C (HeLa-S3)
- vs. Hi-C (H1-hESC)
