# Supplementary material for: Exploring chromosomal structural heterogeneity across multiple cell lines
Source: eLife journal article supplement (doi:10.7554/elife.60312), 2020-10-13
Supplement: supp [file elife-60312-supp-v1.zip › elife_poa_e60312_Figure_2_figure_supplement_1.pdf]

**A** IMR90 **Segment 1** (29.37-31.32Mb)  
Average Contact Map

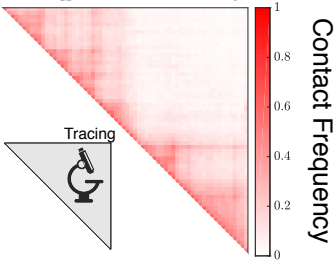

**D** IMR90 **Segment 1** (29.37-31.32Mb)  
Fano Factor

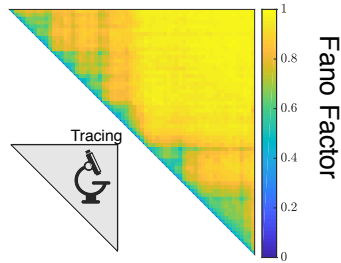

**B** IMR90 **Segment 2** (20.0-21.9Mb)  
Average Contact Map

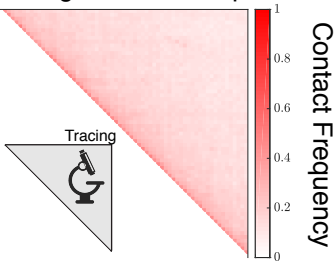

**E** IMR90 **Segment 2** (20.0-21.9Mb)  
Fano Factor

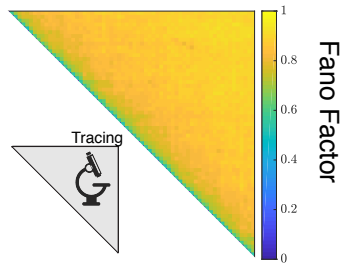

**C** K562 **Segment 1** (29.37-31.32Mb)  
Average Contact Map

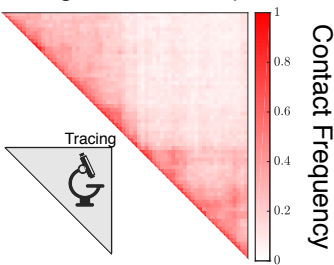

**F** K562 **Segment 1** (29.37-31.32Mb)  
Fano Factor

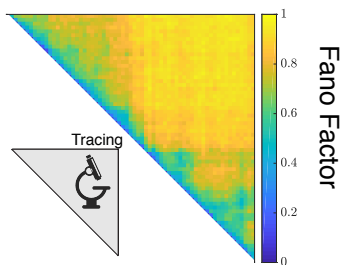

Loop domains form globular lobes at the head and tail of Segment 1

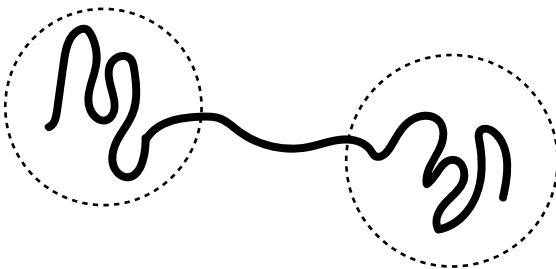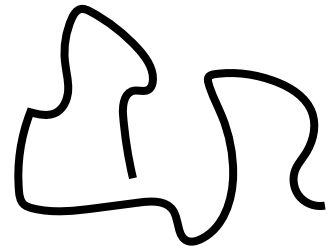

Segment 2 has no loop domains
