# Supplementary material for: Exploring chromosomal structural heterogeneity across multiple cell lines
Source: eLife journal article supplement (doi:10.7554/elife.60312), 2020-10-13

# A Hierarchical Clustering of Traced Structures of IMR90 Segment 2 (chr21 20.0-21.9 Mb)

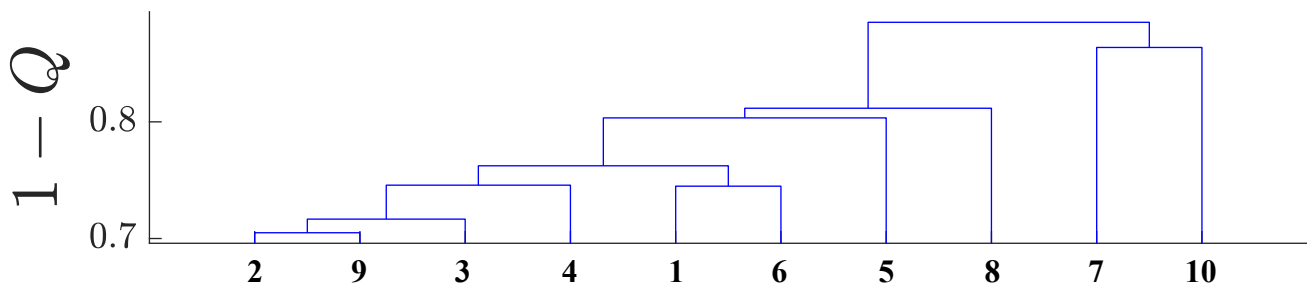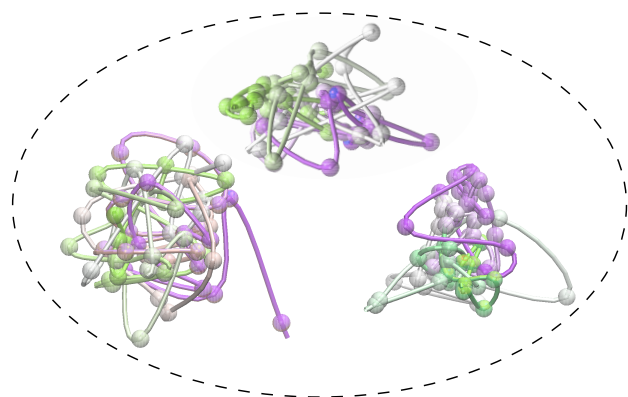

**Cluster 1** (711 structures)

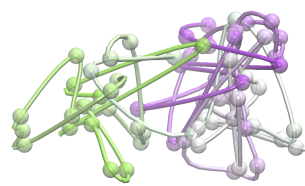

**Cluster 6** (13 structures)

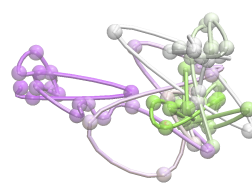

**Cluster 3** (11 structures)

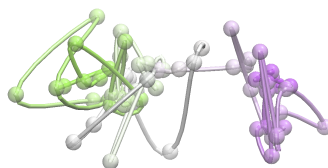

**Cluster 5** (8 structures)

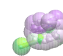

**Cluster 8** (2 structures)

Artifact

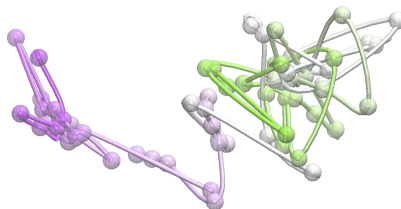

**Cluster 7** (3 structures)

# B Distribution of $R_g$ and Potential of Mean Force for Segment 1

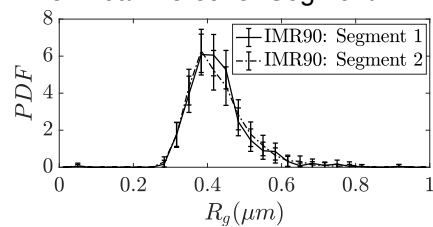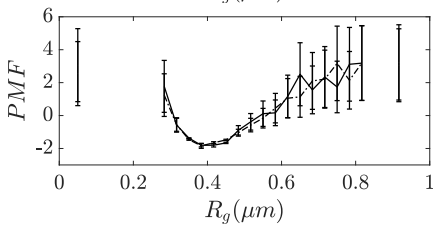

Supplement: supp [file elife-60312-supp-v1.zip › elife_poa_e60312_Figure_2_figure_supplement_3.pdf]
