# Supplementary material for: Exploring chromosomal structural heterogeneity across multiple cell lines
Source: eLife journal article supplement (doi:10.7554/elife.60312), 2020-10-13

## A IMR90 Segment 1 (29.37-31.32Mb)

Unit Length 5% smaller

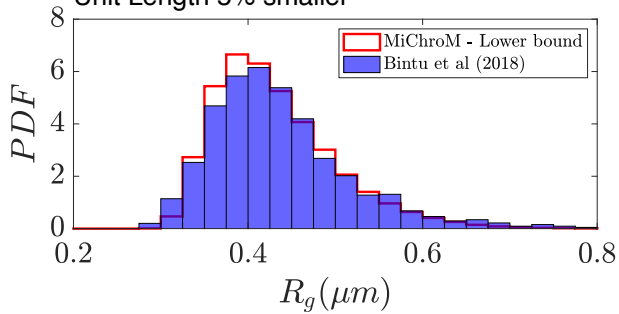

Unit Length 5% larger

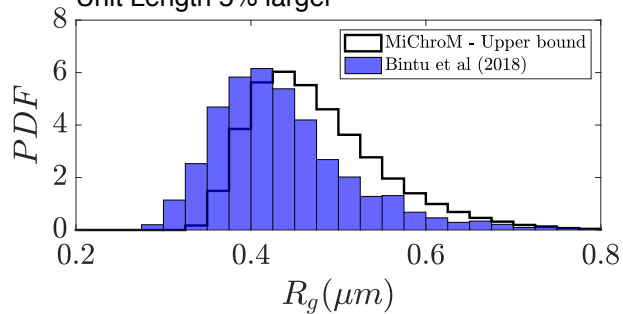

## B K562 Segment 1 (29.37-31.32Mb)

Unit Length 5% smaller

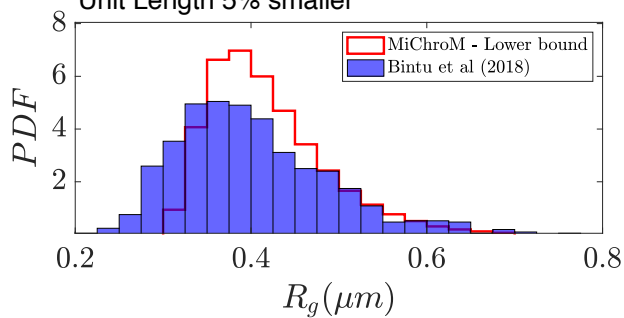

Unit Length 5% larger

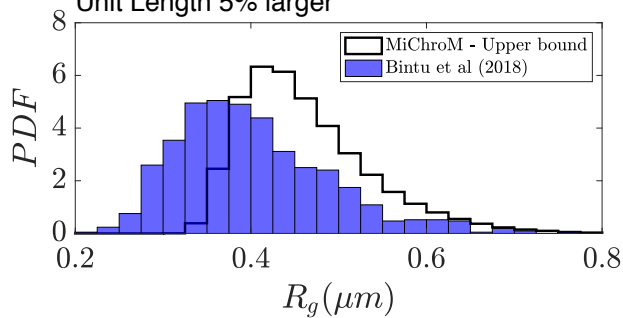

Supplement: supp [file elife-60312-supp-v1.zip › elife_poa_e60312_Figure_3_figure_supplement_2.pdf]
