# Supplementary material for: Exploring chromosomal structural heterogeneity across multiple cell lines
Source: eLife journal article supplement (doi:10.7554/elife.60312), 2020-10-13

**A** Cluster 1 (Closed)  
Average Contact Map (150 kb resolution)

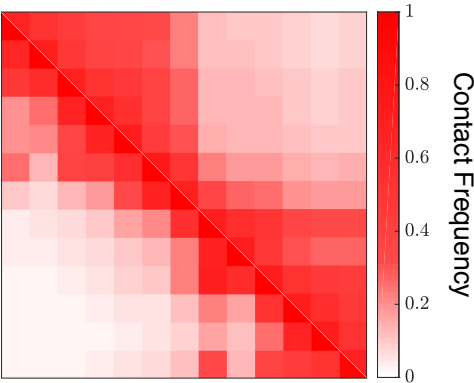

**B** Cluster 2 (Open)  
Average Contact Map (150 kb resolution)

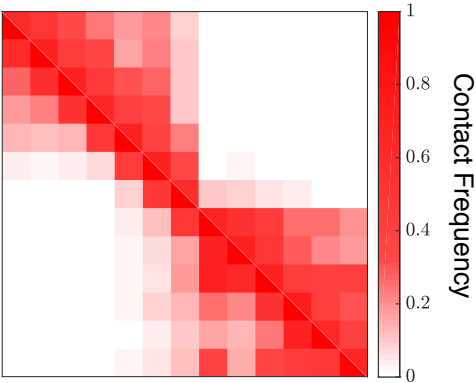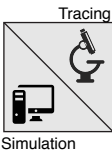

Supplement: supp [file elife-60312-supp-v1.zip › elife_poa_e60312_Figure_3_figure_supplement_3.pdf]
