# Supplementary material for: Exploring chromosomal structural heterogeneity across multiple cell lines
Source: eLife journal article supplement (doi:10.7554/elife.60312), 2020-10-13
Supplement: supp [file elife-60312-supp-v1.zip › elife_poa_e60312_Transparent_Reporting_File.pdf]

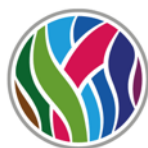

## **eLife's transparent reporting form**

We encourage authors to provide detailed information *within their submission* to facilitate the interpretation and replication of experiments. Authors can upload supporting documentation to indicate the use of appropriate reporting guidelines for health-related research (see [EQUATOR Network](#)), life science research (see the [BioSharing Information Resource](#)), or the [ARRIVE guidelines](#) for reporting work involving animal research. Where applicable, authors should refer to any relevant reporting standards documents in this form.

If you have any questions, please consult our Journal Policies and/or contact us: [editorial@elifesciences.org](mailto:editorial@elifesciences.org).

### **Sample-size estimation**

- You should state whether an appropriate sample size was computed when the study was being designed
- You should state the statistical method of sample size computation and any required assumptions
- If no explicit power analysis was used, you should describe how you decided what sample (replicate) size (number) to use

Please outline where this information can be found within the submission (e.g., sections or figure legends), or explain why this information doesn't apply to your submission:

In our work, we analyzed both experimental structural data that has already been published (Bintu et al, Science 2018) as well as simulated structural data using our computational models.

Our simulations of individual chromosomes allow us to generate an arbitrary amount of structural data for each chromosome. While no explicit power analysis was performed, we demonstrated using a number of statistical measures that our simulated structures (~320,000 structures per chromosome) are quantitatively consistent with experimental Hi-C maps, as well as quantitatively consistent with experimental microscopy results.

### **Replicates**

- You should report how often each experiment was performed
- You should include a definition of biological versus technical replication
- The data obtained should be provided and sufficient information should be provided to indicate the number of independent biological and/or technical replicates
- If you encountered any outliers, you should describe how these were handled
- Criteria for exclusion/inclusion of data should be clearly stated
- High-throughput sequence data should be uploaded before submission, with a private link for reviewers provided (these are available from both GEO and ArrayExpress)

Please outline where this information can be found within the submission (e.g., sections or figure legends), or explain why this information doesn't apply to your submission:

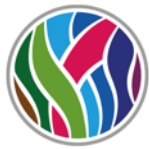

eLIFE

Westbrook Centre, Milton Road

Cambridge CB4 1YG

UK

**P** 01223 855340

**W** [elifesciences.org](http://elifesciences.org)

**T** @elife

Our structural data was produced using computer simulation of our coarse-grained model for individual chromosomes that we described in our paper. All of our results can readily be reproduced by following our methods.



### Statistical reporting

- Statistical analysis methods should be described and justified
- Raw data should be presented in figures whenever informative to do so (typically when N per group is less than 10)
- For each experiment, you should identify the statistical tests used, exact values of N, definitions of center, methods of multiple test correction, and dispersion and precision measures (e.g., mean, median, SD, SEM, confidence intervals; and, for the major substantive results, a measure of effect size (e.g., Pearson's  $r$ , Cohen's  $d$ ))
- Report exact p-values wherever possible alongside the summary statistics and 95% confidence intervals. These should be reported for all key questions and not only when the p-value is less than 0.05.

Please outline where this information can be found within the submission (e.g., sections or figure legends), or explain why this information doesn't apply to your submission:

Figure 1 shows the comparison between the Hi-C maps from simulation compared to experimental Hi-C maps; we used a number of statistical measures commonly used to compare different maps, such as the Pearson  $v$ . genomic distance and the Pearson between the compartment annotations of the simulated and experimental maps.

Figure 2 and 3 show the distributions of the radius of gyration for the experimental and simulated structures, respectively. For both figures, we estimated error bars by performing bootstrap analysis to find the standard deviation of each bin.

(For large datasets, or papers with a very large number of statistical tests, you may upload a single table file with tests, Ns, etc., with reference to sections in the manuscript.)

### Group allocation

- Indicate how samples were allocated into experimental groups (in the case of clinical studies, please specify allocation to treatment method); if randomization was used, please also state if restricted randomization was applied
- Indicate if masking was used during group allocation, data collection and/or data analysis

Please outline where this information can be found within the submission (e.g., sections or figure legends), or explain why this information doesn't apply to your submission:

For our analysis of the experimental chromatin structures from Bintu et al (Science 2018), we focused on structures where  $\geq 90\%$  of the chromatin loci have been spatially resolved. We mainly wanted to focus on structures where the positions of the loci were (mostly) resolved, rather than incomplete structures.

No additional group allocation was performed prior to our statistical analysis.

### Additional data files ("source data")

- We encourage you to upload relevant additional data files, such as numerical data that are represented as a graph in a figure, or as a summary table
- Where provided, these should be in the most useful format, and they can be uploaded as "Source data" files linked to a main figure or table
- Include model definition files including the full list of parameters used
- Include code used for data analysis (e.g., R, MatLab)
- Avoid stating that data files are "available upon request"



eLIFE

Westbrook Centre, Milton Road

Cambridge CB4 1YG

UK

P 01223 855340

W [elifesciences.org](http://elifesciences.org)

T @elife

Please indicate the figures or tables for which source data files have been provided:

|  |
|--|
|  |
|--|
