# Supplementary figures and images for: Exploring chromosomal structural heterogeneity across multiple cell lines
Source: eLife journal article supplement (doi:10.7554/elife.60312), 2020-10-13

# HMEC (chr 2)

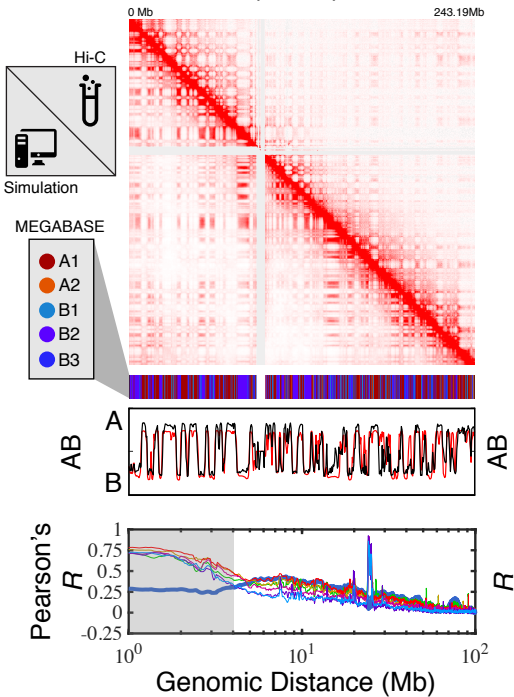

## Legend

Matching cell type:

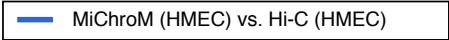

Mismatching cell type:

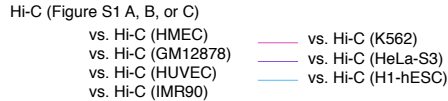

Supplement: supp [file elife-60312-supp-v1.zip › elife_poa_e60312_Figure_1_figure_supplement_1.pdf]

# HeLa-S3 (chr 2)

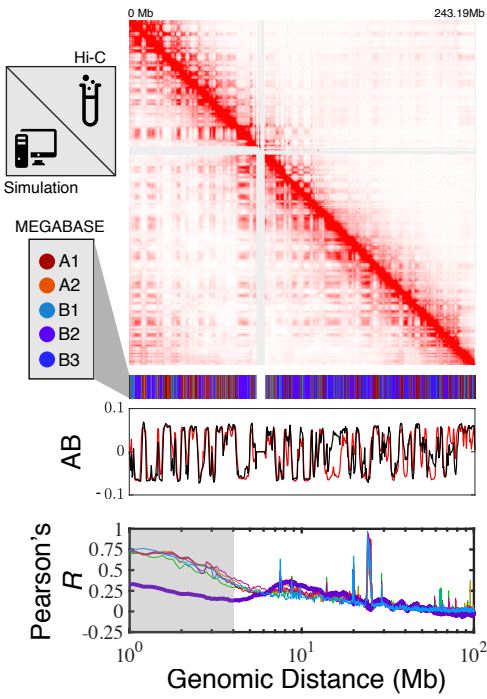

## Legend

Matching cell type:

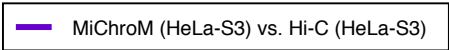

Mismatching cell type:

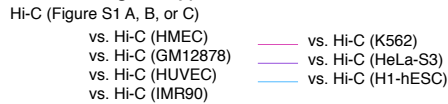

Supplement: supp [file elife-60312-supp-v1.zip › elife_poa_e60312_Figure_1_figure_supplement_3.pdf]

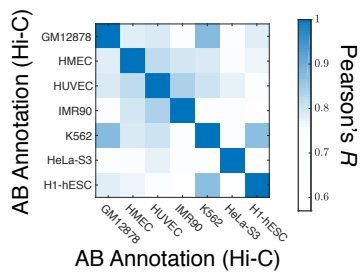

Supplement: supp [file elife-60312-supp-v1.zip › elife_poa_e60312_Figure_1_figure_supplement_4.pdf]

**A** IMR90 chr2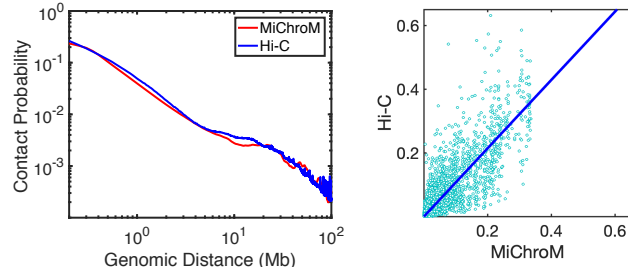**B** HUVEC chr2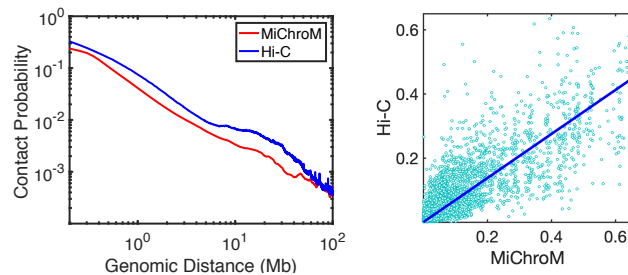**C** K562 chr2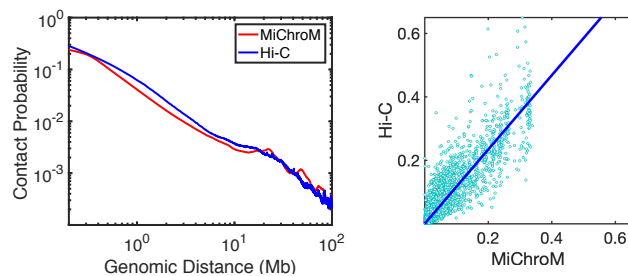**D** HMEC chr2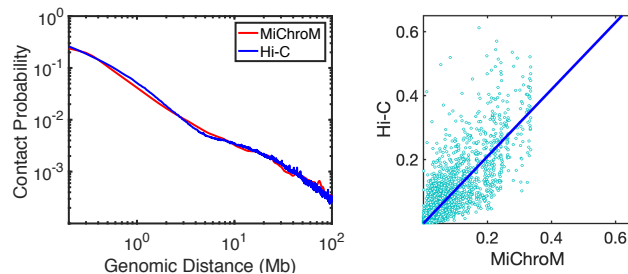**E** H1-hESC chr2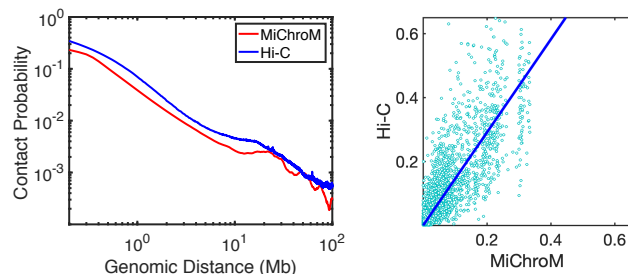**F** HeLa-S3 chr2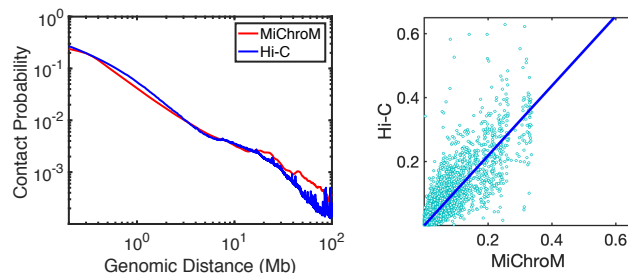

Supplement: supp [file elife-60312-supp-v1.zip › elife_poa_e60312_Figure_1_figure_supplement_5.pdf]

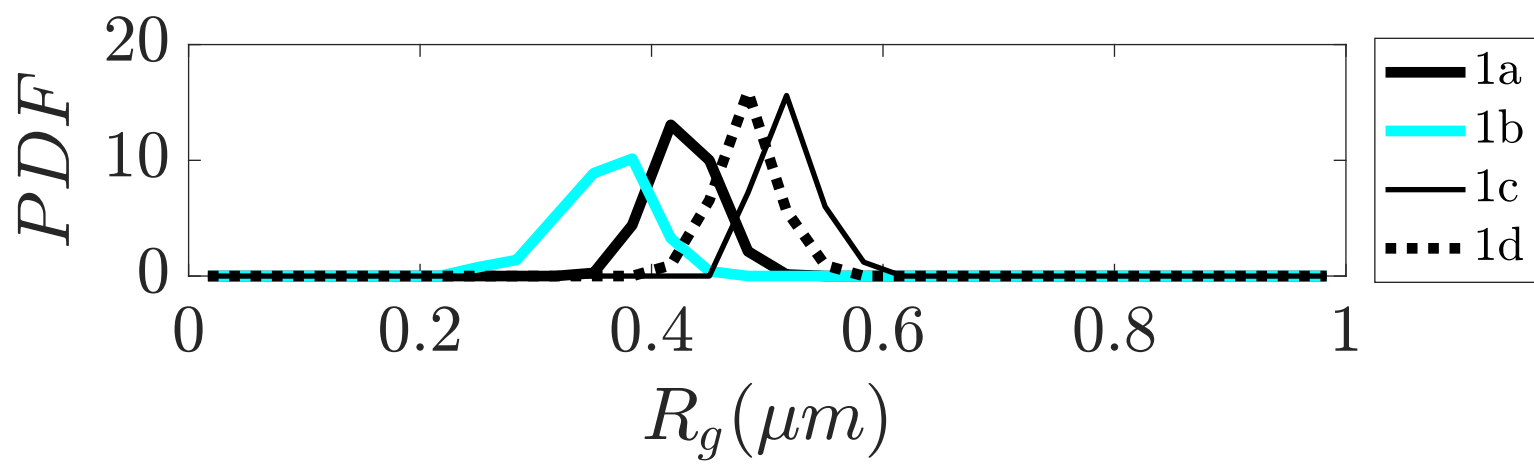

Supplement: supp [file elife-60312-supp-v1.zip › elife_poa_e60312_Figure_2_figure_supplement_2.pdf]

Loop domains form globular lobes at the head and tail of Segment 1

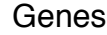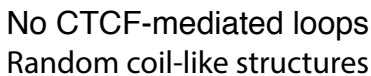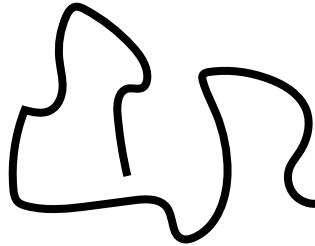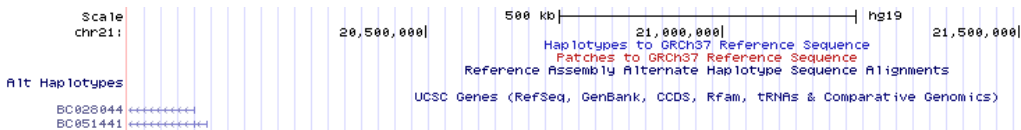

Supplement: supp [file elife-60312-supp-v1.zip › elife_poa_e60312_Figure_2_figure_supplement_4.pdf]

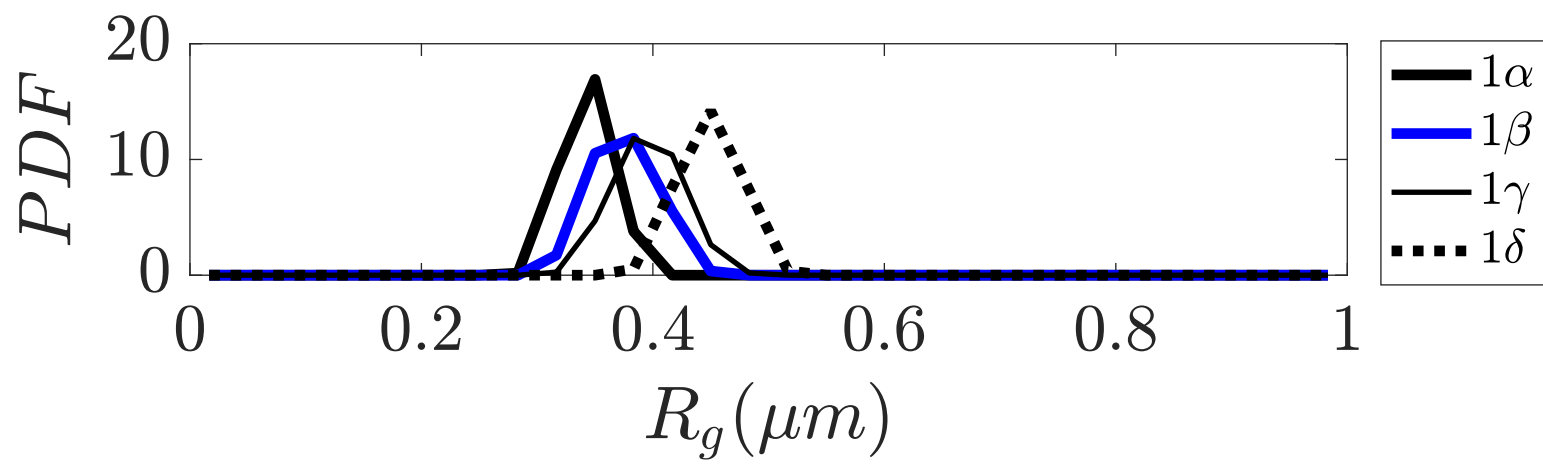

Supplement: supp [file elife-60312-supp-v1.zip › elife_poa_e60312_Figure_3_figure_supplement_1.pdf]
